# Supplementary material for: The Effect of Delivery Matrix on Bifidobacterium animalis subsp. lactis HN019 Survival through In Vitro Human Digestion
Source: MDPI journal article supplement (doi:10.3390/nu15163541), 2023-08-11
Supplement: s1 [file s1]

*Bifidobacterium animalis* subsp. *lactis* HN019, B420

TTTCGATGGTTTCGCACAGTGA GTTGTTCACTC CCCTCAATGAAGCTCCGAAGCCGAGACTTCGGAGAT TT  
CGTCTC CTCCCTGCGCCGCTGATTGACCTGTTT CCCTCAATGAAGCTCCGAAGCCGAGACTTCGGAGAT  
ATTTCAGGCGGCATCAGACC

158 bp

*Bifidobacterium animalis* subsp. *lactis* BI04, Bi07

TTTCGATGGTTTCGCACAGTGA GTTGTTCACTC CCCTCAATGAAGCTCCGAAGCCGAGACTTCGGAGAT TT  
CGTCTC CTCCCTGCGCCGCTGATTGACCTGTTT CCCTCAATGAAGCTCCGAAGCCGAGACTTCGGAGAT  
GTGATCCACGTGACGAATCATGGGCCGAGGGATT CCCTCAATGAAGCTCCGAAGCCGAGACTTCGGAG  
AT GTCTCATCAGCGGCCGCCACGGGTATCAATCTCAAT CCCTCAATGAAGCTCCGAAGCCGAGACTTCGG  
AGAT CCATTCCACCGTTTCGGCGTATTTCGACACCACAGTG CCCTCAATGAAGCTCCGAAGCCGAGACTT  
CGGAGAT ATTTCAGGCGGCATCAGACC

372 bp

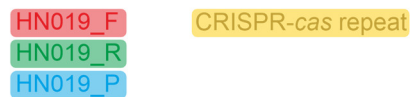

**Figure S1.** *Bifidobacterium animalis* subsp. *lactis* qPCR amplicons, showing CRISPR-cas repeats that were targeted for assay design. The assay described in this manuscript detects both strains HN019 and B420 (158 bp amplicon) with the same efficiency (~90%). Strains BI-04 and Bi-07 (372 bp amplicon) are not detectable if either HN019 or B420 are present.

**Table S1.** *Bifidobacterium animalis* subsp. *lactis* HN019 qPCR assay optimization: panel of bacterial strains tested for amplification at 1 ng of total DNA.

| Bacteria                                                      | Detection (Yes/No) |
|---------------------------------------------------------------|--------------------|
| <i>Bifidobacterium animalis</i> subsp. <i>lactis</i> HN019    | Yes                |
| <i>Bifidobacterium animalis</i> subsp. <i>lactis</i> B420     | Yes                |
| <i>Bifidobacterium animalis</i> subsp. <i>lactis</i> BI-04    | Yes *              |
| <i>Bifidobacterium animalis</i> subsp. <i>lactis</i> Bi-07    | Yes *              |
| <i>Bifidobacterium animalis</i> subsp. <i>lactis</i> DSM15954 | No                 |
| <i>Bifidobacterium breve</i> Bb-03                            | No                 |
| <i>Bifidobacterium longum</i> DGS                             | No                 |
| <i>Bifidobacterium infantis</i> Bi-26                         | No                 |
| <i>Butyrivibrio fibrisolvens</i> DSM 3071                     | No                 |
| <i>Clostridium leptum</i> DSM 753                             | No                 |
| <i>Escherichia coli</i> K88                                   | No                 |
| <i>Faecalibacterium prausnitzii</i> DSM 107838                | No                 |
| <i>Lactobacillus acidophilus</i> NCFM                         | No                 |
| <i>Lactocaseibacillus rhamnosus</i> ATCC53103                 | No                 |

\* Assay detects strains BI-04 and Bi-07 when each strain is solely present, when mixed (1:1) with either HN019 or B420 the signal corresponds to the amount of present HN019 or B420 only. The amplification efficiency difference is enough to discriminate the two groups of *Bifidobacterium lactis* strains.
